# Supplementary material for: In Vivo Capillary Structure and Blood Cell Flux in the Normal and Diabetic Mouse Eye
Source: PubMed Central journal article supplement (PMC8842443; doi:10.1167/iovs.63.2.18), 2022-02-09
Supplement: iovs-63-2-18_s001.pdf [file iovs-63-2-18_s001.pdf]

**Supplementary Tables:**

| Weekly weight measurements for 9 Euglycemic Mice (grams) |              |       |       |       |       |       |       |       |       |
|----------------------------------------------------------|--------------|-------|-------|-------|-------|-------|-------|-------|-------|
| Postnatal week                                           | Mouse Number |       |       |       |       |       |       |       |       |
|                                                          | 01           | 02    | 03    | 04    | 05    | 06    | 07    | 08    | 09    |
| 3                                                        | 12.82        | 6.47  | 11.63 | 11.6  | 7.5   | 4.4   | 10.3  | 10.16 | 12.62 |
| 4                                                        | 13.74        | 10.3  | 18.1  | 18.2  | 13.5  | 6.1   | 14.49 | 15.19 | 18.22 |
| 5                                                        | 19.35        | 15.9  | 21.32 | 22.4  | 18.89 | 11.85 | 19.03 | 17.78 | 20.61 |
| 6                                                        | 20.74        | 18.26 | 22.79 | 21.67 | 20.19 | 13.25 | 20.52 | 19.74 | 22.3  |
| 7                                                        | 22.4         | 19.1  | 24.75 | 24.56 | 21.23 | 15.93 | 22.34 | 20.54 | 22.3  |
| 8                                                        | 24.32        | 20.45 | 24.86 | 25.36 | 21.15 | 19.78 | 23.29 | 20.82 | 21.77 |
| 9                                                        | 25.38        | 22.03 | 24.32 | 25.91 | 22.95 | 20.01 | 23.41 | 21.41 | 24.94 |
| 10                                                       | 26.58        | 23.3  | 25.09 | 26.3  | 23.37 | 20.97 | 24.21 | 21.86 | 26.29 |
| 11                                                       | 26.9         | 22.1  | 28.44 | 28.43 | 24.24 | 21.76 | 25.92 | 22.04 | 26.28 |
| 12                                                       | 28.03        | 25.08 | 28.18 | 27.61 | 25.08 | 22.03 | 27.5  | 22.7  | 27.42 |
| 13                                                       | 29.32        | 25.31 | 29.04 | 29.16 | 25.2  | 23    | 26.76 | 22.75 | 27.49 |
| 14                                                       | 29.82        | 25.52 | 30.14 | 30.28 | 25.56 | 23.33 | 27.4  | 23.32 | 28.56 |
| 15                                                       | 29.29        | 25.99 | 30.36 | 30.5  | 26.49 | 24.39 | 27.78 | 23.65 | 29.1  |
| 16                                                       | 30.29        | 26.88 | 29.3  | 29.1  | 26.68 | 24.83 | 27.88 | 23.55 | 29.04 |
| 17                                                       | 32.1         | 27.7  | 30.84 | 30.65 | 25.55 | 23.54 | 28.69 | 24.54 | 29.72 |
| 18                                                       | 31.6         | 27.52 | 30.78 | 30.41 | 27.54 | 25.89 | 28.33 | 24.41 | 31.3  |
| 19                                                       | 32.3         | 29.01 | 31.38 | 31.03 | 28.08 | 24.7  | 29.04 | 24.54 | 30.95 |
| 20                                                       | 33.84        | 28.73 | 31.95 | 30.92 | 28.59 | 25.62 | 29.2  | 24.94 | 31.03 |
| 21                                                       | 35.16        | 29.36 | 31.95 | 30.84 | 25.05 | 22.48 | 29.95 | 25.31 | 30.72 |
| 22                                                       | 35.06        | 29.6  | 32.53 | 32.33 | 28.66 | 26.28 | 31.14 | 25.65 | 31.83 |
| 23                                                       | 36.47        | 29.63 | 32.51 | 32.71 | 28.95 | 26.28 | 30.72 | 25.77 | 33.04 |
| 24                                                       | 37.38        | 30.03 | 33.39 | 33.16 | 29.01 | 26.75 | 31.52 | 26.5  | 34.06 |
| 25                                                       | 36.43        | 27.95 | 33.17 | 33.09 | 30.1  | 27.22 | 31.5  | 26.01 | 35.32 |
| 26                                                       | 38.85        | 30.04 | 33.7  | 33.31 | 32.06 | 28    | 32.42 | 26.18 | 35.37 |
| 27                                                       | 40.18        | 30.69 | 34.5  | 34.56 | 30.37 | 27.47 | 32.21 | 26.24 | 34.85 |
| 28                                                       | 40.63        | 31.29 | 34.79 | 34.17 | 29.58 | 27.07 | 32.1  | 27.07 | 36.01 |
| 29                                                       | 40.89        | 32.23 | 34.14 | 34.26 | 30.01 | 27.32 | 32.27 | 26.99 | 37.48 |
| 30                                                       | 40.98        | 31.78 | 34.3  | 34.54 | 31.15 | 28.61 | 31.62 | 27.05 | 37.5  |
| 31                                                       | 41.04        | 32.13 | 34.95 | 34.23 | 31.55 | 28.99 | 32.48 | 26.94 | 37.84 |
| 32                                                       | 40.94        | 32.48 | 34.18 | 34.31 | 31.58 | 28.78 | 32.5  | 27.28 | 38.06 |
| 33                                                       | 41.58        | 32.57 | 35.58 | 34.49 | 31.65 | 28.8  | 32.57 | 27.1  | 37.95 |
| 34                                                       | 40.65        | 31.95 | 35.69 | 34.54 | 31.02 | 28.51 | 32.89 | 26.82 | 38.19 |
| 35                                                       | 41.49        | 33.34 | 35.14 | 34.57 | 31.88 | 28.9  | 31.54 | 27.1  | 38.72 |
| 36                                                       | 43.55        | 32.75 | 34.76 | 34.21 | 32.02 | 27.64 | 32    | 27.48 | 39.19 |
| 37                                                       | 43.64        | 32.9  | 35.02 | 33.89 | 31.93 | 28.01 | 32.86 | 27.51 | 39.88 |
| 38                                                       | 42.19        | 32.58 | 35.49 | 34.81 | 32.31 | 28.33 | 32.49 | 27.29 | 40.69 |
| 39                                                       | 43.87        | 33.09 | 36.17 | 34.66 | 32.5  | 28.5  | 32.31 | 27.33 | 40.9  |
| 40                                                       | 43.89        | 34.16 | 36.09 | 35.01 | 32.75 | 28.75 | 33.05 |       |       |

**Supplementary table 1: Weekly weight measurements (in grams) for 9 euglycemic mice from postnatal week 3-40**

| Weekly weight measurements for 9 Hyperglycemic Mice (grams) |       |       |       |       |       |       |       |       |       |
|-------------------------------------------------------------|-------|-------|-------|-------|-------|-------|-------|-------|-------|
| Mouse number                                                |       |       |       |       |       |       |       |       |       |
| Postnatal Week                                              | 01    | 02    | 03    | 04    | 05    | 06    | 07    | 08    | 09    |
| 3                                                           | 9.24  | 9.68  | 11.69 | 6.84  | 5.1   | 10.1  | 10.23 | 7.47  | 10.28 |
| 4                                                           | 7.65  | 10.3  | 17.34 | 12.3  | 10.6  | 16.15 | 15.43 | 13.19 | 15.48 |
| 5                                                           | 12.06 | 16.33 | 20.08 | 17.36 | 15.84 | 17.21 | 17.55 | 15.44 | 17.4  |
| 6                                                           | 16.27 | 20.08 | 20.43 | 17.69 | 17.35 | 21.51 | 18.67 | 17.05 | 18.67 |
| 7                                                           | 17.46 | 19.98 | 23.96 | 18.48 | 18.83 | 21.16 | 19.43 | 18.62 | 20.32 |
| 8                                                           | 18.47 | 21.08 | 24.86 | 20.29 | 22.5  | 22.79 | 21.15 | 19.33 | 21.44 |
| 9                                                           | 21.19 | 23.25 | 25.3  | 21.18 | 22.79 | 23.42 | 22.89 | 21.17 | 22.17 |
| 10                                                          | 22.48 | 24.99 | 25.87 | 21.77 | 25.02 | 24.1  | 23.17 | 21.86 | 20.53 |
| 11                                                          | 22.76 | 24.4  | 26.8  | 22.36 | 25    | 25.8  | 23.68 | 22.11 | 24.36 |
| 12                                                          | 24.02 | 25.29 | 27.68 | 23.35 | 26.05 | 25.97 | 24.22 | 22.35 | 24.66 |
| 13                                                          | 24.53 | 25.81 | 27.14 | 24.15 | 27.7  | 26.29 | 25.2  | 23.9  | 25.5  |
| 14                                                          | 24.56 | 25.82 | 28.58 | 24.39 | 26.63 | 26.72 | 25.65 | 23.15 | 25.98 |
| 15                                                          | 25.05 | 26.79 | 28.44 | 24.79 | 24.8  | 27.4  | 25.83 | 23.99 | 27.39 |
| 16                                                          | 25.18 | 27.07 | 28.6  | 25.63 | 27.69 | 26.96 | 26.01 | 23.85 | 26.32 |
| 17                                                          | 26.07 | 28.15 | 28.23 | 22.11 | 23.43 | 28.38 | 25.92 | 24.49 | 27.45 |
| 18                                                          | 26.17 | 28.22 | 28.9  | 27.38 | 28.68 | 28.67 | 26.41 | 24.21 | 26.85 |
| 19                                                          | 26.89 | 28.73 | 30.55 | 27.89 | 27.92 | 28.42 | 26.43 | 24.24 | 26.66 |
| 20                                                          | 26.72 | 29.06 | 30.56 | 28.03 | 28.03 | 29    | 26.82 | 24.55 | 27.43 |
| 21                                                          | 26.61 | 28.9  | 30.33 | 20.68 | 20.82 | 28.35 | 27.78 | 24.98 | 27.64 |
| 22                                                          | 27.44 | 29.64 | 31.39 | 28.82 | 28.9  | 30.29 | 28.84 | 25.85 | 29.16 |
| 23                                                          | 27.64 | 30.69 | 30.79 | 28.93 | 29.12 | 29.73 | 28.17 | 26.03 | 27.73 |
| 24                                                          | 28.46 | 30.83 | 30.28 | 30.34 | 29.5  | 30.72 | 28.5  | 28.57 | 28.59 |
| 25                                                          | 24.08 | 24.61 | 31.41 | 30.64 | 30.44 | 29.88 | 28    | 26.61 | 27.8  |
| 26                                                          | 28.71 | 30.29 | 32.11 | 28.36 | 28.24 | 30.7  | 28.08 | 26.65 | 27.86 |
| 27                                                          | 28.74 | 30.5  | 31.48 | 30.07 | 29.56 | 30.07 | 28.05 | 25.98 | 28.65 |
| 28                                                          | 28.55 | 30.23 | 32.18 | 28.51 | 26.5  | 30.24 | 28.86 | 21.94 | 20.34 |
| 29                                                          | 29.55 | 31.68 | 31.02 | 28.28 | 26.56 | 30.61 | 28.93 | 27.09 | 29.01 |
| 30                                                          | 29.82 | 32.02 | 31.9  | 28.95 | 27.95 | 30.3  | 29.01 | 27.15 | 28.87 |
| 31                                                          | 30.15 |       | 31.18 | 20.28 | 20.27 | 30    | 29.18 | 27.97 | 28.52 |
| 32                                                          | 28.81 |       | 32.83 | 30.03 | 28.51 | 29.94 | 28.95 | 27.25 | 28.01 |
| 33                                                          | 28.85 |       | 32.98 | 29.92 | 28.23 | 29.15 | 28.6  | 27.01 | 27.56 |
| 34                                                          | 27.96 |       | 33.2  | 29.9  | 27.91 | 29.18 | 28.92 | 26.93 | 26.19 |
| 35                                                          | 29.49 |       | 33.18 | 29.54 | 28.1  | 30.05 | 29    | 26.47 | 27.63 |
| 36                                                          | 30.78 |       | 32.59 | 28.83 | 28.38 | 29.98 | 28.96 | 27.15 | 27.4  |
| 37                                                          | 30.69 |       | 32.54 | 29.04 | 28.65 | 29.4  | 28.76 | 26.03 | 26.49 |
| 38                                                          | 30.22 |       | 32.87 | 29.15 | 27.74 | 28.99 | 26.49 | 28.39 |       |
| 39                                                          | 30.87 |       | 31.86 | 29.29 | 28.43 | 28.42 | 26.3  | 28.36 |       |
| 40                                                          | 29.95 |       | 32.04 | 29.5  | 29.09 | 29.15 |       |       |       |

**Supplementary table 2: Weekly weight measurements (in grams) for 9 hyperglycemic mice from postnatal week 3-40**

| Weekly blood glucose measurements for 9 Euglycemic Mice (mg/dL) |     |     |     |     |     |     |     |     |     |
|-----------------------------------------------------------------|-----|-----|-----|-----|-----|-----|-----|-----|-----|
| Mouse Number                                                    |     |     |     |     |     |     |     |     |     |
| Postnatal week                                                  | 01  | 02  | 03  | 04  | 05  | 06  | 07  | 08  | 09  |
| 3                                                               | 235 | 284 | 205 | 145 | 233 |     |     | 147 | 185 |
| 4                                                               | 222 | 228 | 273 | 227 | 249 |     | 288 | 207 | 262 |
| 5                                                               | 250 | 269 | 128 | 155 | 143 | 127 | 247 | 151 | 174 |
| 6                                                               | 160 | 148 | 138 | 172 | 154 | 225 | 306 | 176 | 139 |
| 7                                                               | 160 | 154 | 241 | 211 | 183 | 329 | 214 | 188 | 195 |
| 8                                                               | 161 | 201 | 175 | 187 | 229 | 202 | 121 | 149 | 184 |
| 9                                                               | 131 | 133 | 128 | 144 | 262 | 221 | 221 | 175 | 186 |
| 10                                                              | 176 | 229 | 224 | 120 | 195 | 216 | 196 | 166 | 140 |
| 11                                                              | 152 | 211 | 194 | 196 | 238 | 133 | 276 | 196 | 149 |
| 12                                                              | 184 | 203 | 211 | 193 | 135 | 151 | 214 | 126 | 136 |
| 13                                                              | 246 | 165 | 131 | 141 | 144 | 188 | 200 | 178 | 132 |
| 14                                                              | 182 | 146 | 191 | 145 | 133 | 169 | 181 | 132 | 170 |
| 15                                                              | 205 | 144 | 183 | 154 | 156 | 230 | 125 | 230 | 239 |
| 16                                                              | 227 | 202 | 191 | 160 | 148 | 136 | 205 | 140 | 224 |
| 17                                                              | 141 | 160 | 214 | 165 | 189 | 221 | 195 | 190 | 172 |
| 18                                                              | 145 | 142 | 147 | 167 | 185 | 180 | 196 | 166 | 186 |
| 19                                                              | 210 | 161 | 185 | 159 | 162 | 201 | 192 | 186 | 196 |
| 20                                                              | 163 | 180 | 239 | 199 | 208 | 255 | 187 | 192 | 174 |
| 21                                                              | 256 | 181 | 250 | 223 | 124 | 157 | 230 | 181 | 196 |
| 22                                                              | 164 | 175 | 203 | 174 | 188 | 195 | 189 | 160 | 185 |
| 23                                                              | 206 | 183 | 211 | 250 | 195 | 159 | 181 | 176 | 217 |
| 24                                                              | 242 | 179 | 195 | 172 | 211 | 211 | 172 | 197 | 156 |
| 25                                                              | 179 | 184 | 148 | 161 | 171 | 171 | 223 | 173 | 182 |
| 26                                                              | 238 | 231 | 191 | 142 | 160 | 160 | 151 | 184 | 165 |
| 27                                                              | 180 | 198 | 249 | 235 | 169 | 169 | 200 | 189 | 237 |
| 28                                                              | 220 | 194 | 210 | 170 | 172 | 172 | 237 | 287 | 172 |
| 29                                                              | 229 | 155 | 212 | 215 | 193 | 193 | 213 | 132 | 171 |
| 30                                                              | 215 | 160 | 194 | 206 | 159 | 159 | 142 | 171 | 144 |
| 31                                                              | 164 | 169 | 141 | 176 | 165 | 165 | 160 | 185 | 157 |
| 32                                                              | 221 | 191 | 253 | 194 | 222 | 222 | 150 | 196 | 153 |
| 33                                                              | 205 | 146 | 214 | 187 | 165 | 165 | 150 | 144 | 202 |
| 34                                                              | 204 | 191 | 186 | 155 | 201 | 201 | 187 | 128 | 145 |
| 35                                                              | 234 | 225 | 202 | 188 | 189 | 189 | 163 | 197 | 198 |
| 36                                                              | 161 | 219 | 251 | 154 | 143 | 143 | 121 | 208 | 200 |
| 37                                                              | 169 | 191 | 185 | 122 | 196 | 196 | 185 | 165 | 188 |
| 38                                                              | 188 | 155 | 142 | 189 | 257 | 257 | 202 | 191 | 200 |
| 39                                                              | 197 | 186 | 188 | 193 | 172 | 172 | 193 | 193 | 212 |
| 40                                                              | 162 | 200 | 192 | 185 | 180 | 180 | 205 |     |     |

**Supplementary table 3: Weekly blood glucose measurements (in mg/dL) for 9 euglycemic mice from postnatal week 3-40**

| Weekly blood glucose measurements for 9 Hyperglycemic Mice (mg/dL) |              |     |     |     |     |     |     |     |     |
|--------------------------------------------------------------------|--------------|-----|-----|-----|-----|-----|-----|-----|-----|
|                                                                    | Mouse Number |     |     |     |     |     |     |     |     |
| Postnatal Week                                                     | 01           | 02  | 03  | 04  | 05  | 06  | 07  | 08  | 09  |
| 3                                                                  | 393          | 248 | 559 | 309 |     |     | 361 | 292 | 205 |
| 4                                                                  | 447          | 155 | 344 | 300 | 365 | 201 | 206 | 301 | 224 |
| 5                                                                  | 376          | 305 | 392 | 264 | 285 | 436 | 502 | 236 | 277 |
| 6                                                                  | 416          | 442 | 531 | 349 | 535 | 561 | 365 | 323 | 341 |
| 7                                                                  | 340          | 345 | 524 | 449 | 481 | 600 | 497 | 531 | 416 |
| 8                                                                  | 298          | 505 | 440 | 501 | 600 | 508 | 338 | 352 | 354 |
| 9                                                                  | 337          | 495 | 357 | 416 | 504 | 588 | 371 | 303 | 323 |
| 10                                                                 | 360          | 404 | 502 | 416 | 547 | 413 | 348 | 353 | 371 |
| 11                                                                 | 573          | 473 | 600 | 451 | 600 | 475 | 395 | 314 | 400 |
| 12                                                                 | 300          | 588 | 540 | 344 | 541 | 438 | 347 | 340 | 485 |
| 13                                                                 | 439          | 522 | 406 | 422 | 579 | 463 | 424 | 392 | 572 |
| 14                                                                 | 488          | 550 | 457 | 555 | 503 | 479 | 508 | 459 | 600 |
| 15                                                                 | 499          | 524 | 434 | 561 | 543 | 513 | 535 | 491 | 480 |
| 16                                                                 | 410          | 548 | 501 | 532 | 593 | 600 | 600 | 597 | 600 |
| 17                                                                 | 362          | 467 | 419 | 530 | 436 | 600 | 589 | 522 | 522 |
| 18                                                                 | 529          | 516 | 419 | 544 | 563 | 600 | 441 | 502 | 583 |
| 19                                                                 | 542          | 468 | 599 | 600 | 600 | 595 | 583 | 563 | 588 |
| 20                                                                 | 491          | 600 | 572 | 600 | 600 | 558 | 452 | 349 | 600 |
| 21                                                                 | 563          | 591 | 587 | 571 | 600 | 600 | 479 | 370 | 600 |
| 22                                                                 | 551          | 600 | 556 | 600 | 600 | 600 | 514 | 426 | 575 |
| 23                                                                 | 598          | 600 | 600 | 584 | 600 | 600 | 536 | 447 | 600 |
| 24                                                                 | 600          | 600 | 533 | 600 | 600 | 600 | 542 | 403 | 496 |
| 25                                                                 | 371          | 600 | 472 | 600 | 600 | 535 | 541 | 500 | 600 |
| 26                                                                 | 600          | 600 | 456 | 600 | 600 | 560 | 555 | 584 | 600 |
| 27                                                                 | 600          | 600 | 600 | 600 | 600 | 542 | 588 | 490 | 587 |
| 28                                                                 | 600          | 600 | 578 | 600 | 600 | 600 | 585 | 306 | 550 |
| 29                                                                 | 560          | 600 | 600 | 600 | 600 | 600 | 591 | 536 | 574 |
| 30                                                                 | 537          | 600 | 555 | 600 | 600 | 570 | 600 | 573 | 600 |
| 31                                                                 | 600          |     | 563 | 600 | 600 | 600 | 576 | 600 | 600 |
| 32                                                                 | 600          |     | 575 | 600 | 600 | 600 | 600 | 600 | 600 |
| 33                                                                 | 600          |     | 600 | 600 | 600 | 592 | 600 | 600 | 588 |
| 34                                                                 | 600          |     | 600 | 600 | 600 | 540 | 512 | 598 | 513 |
| 35                                                                 | 600          |     | 588 | 600 | 600 | 600 | 598 | 532 | 600 |
| 36                                                                 | 600          |     | 600 | 600 | 600 | 600 | 577 | 600 | 600 |
| 37                                                                 | 600          |     | 600 | 600 | 600 | 600 | 583 | 600 | 600 |
| 38                                                                 | 600          |     | 600 | 600 | 600 | 599 | 600 | 600 |     |
| 39                                                                 | 600          |     | 592 | 600 | 600 | 600 | 600 | 600 |     |
| 40                                                                 | 600          |     | 600 | 600 | 600 | 600 |     |     |     |

**Supplementary table 4: Weekly blood glucose measurements (in mg/dL) for 9 hyperglycemic mice from postnatal week 3-40**

|         | Image Magnification (um/1 degree) |
|---------|-----------------------------------|
| week 5  | 32.05                             |
| week 6  | 32.26                             |
| week 7  | 32.47                             |
| week 8  | 32.68                             |
| week 9  | 32.89                             |
| week 10 | 33.1                              |
| week 11 | 33.31                             |
| week 12 | 33.52                             |
| week 13 | 33.73                             |
| week 14 | 33.94                             |
| week 15 | 34                                |
| week 16 | 34                                |
| week 17 | 34                                |
| week 18 | 34                                |

**Supplementary Table 5.** Age based magnification scaling for the growing C57BL6/J mouse eye (derived from <sup>49</sup>)

|                              | Total measurements | Min Flux | Max Flux | Mean Flux | Min Diameter | Max Diameter | Mean Diameter |
|------------------------------|--------------------|----------|----------|-----------|--------------|--------------|---------------|
| Guevara-Torres et al. 2016   | 99                 | 17       | 539      | 159       | 3.2          | 6.5          | 4             |
| Current study: Euglycemic    | 548                | 5        | 410      | 106       | 2.8          | 6.8          | 4.1           |
| Current study: Hyperglycemic | 405                | 3        | 357      | 102       | 2.9          | 7            | 4.1           |

**Supplementary Table 6.** Comparison of capillary Flux/diameter metrics with previous study<sup>33</sup>
